# Supplementary material for: Dietary Supplementation with Popped Amaranth Modulates the Gut Microbiota in Low Height-for-Age Children: A Nonrandomized Pilot Trial
Source: MDPI journal article supplement (doi:10.3390/foods12142760), 2023-07-20
Supplement: s1 [file s1]

## **SUPPLEMENTARY INFORMATION**

**Dietary supplementation with popped amaranth  
modulates the gut microbiota in low height-for-age  
children: A nonrandomized pilot trial**

**Supplementary Table S1.** Proximal composition of popped amaranth (*Amaranthus hypochondriacus*)

| <b>Amaranth</b>      | <b>Popped grain</b> |
|----------------------|---------------------|
| <b>Protein</b>       | 15.8 ±0.6           |
| <b>Fat</b>           | 6.7 ±1.4            |
| <b>Fiber</b>         | 3.8 ±0.9            |
| <b>Ashes</b>         | 2.2 ±0.3            |
| <b>Carbohydrates</b> | 63.4 ±3.9           |

Mean of triplicates ± standard deviation

**Supplementary Table S2.** Hematic cytometry of participant's children with low-height for age according to HAZ index

| Determination                            | Normal         | Undernutrition |                                  | Biological limits |
|------------------------------------------|----------------|----------------|----------------------------------|-------------------|
|                                          | (n = 21)       | (n = 9)        | (n = 7)                          |                   |
| <b>Red blood cells</b>                   |                |                |                                  |                   |
| Erythrocytes ( $\times 10^6$ )           | $4.9 \pm 0.1$  | $4.8 \pm 0.1$  | $4.7 \pm 0.1$                    | 4.3 - 5.2         |
| Hemoglobin (g/dL)                        | $13.2 \pm 0.1$ | $13.2 \pm 0.4$ | $13.6 \pm 0.3$                   | 12.5 – 15         |
| Hematocrit (%)                           | $40.7 \pm 0.4$ | $40.9 \pm 0.9$ | <b><math>42.4 \pm 0.7</math></b> | 37.5 – 48         |
| Mean corpuscular volume MCV (fL)         | $83.6 \pm 0.8$ | $84.9 \pm 0.9$ | <b><math>89.7 \pm 1.1</math></b> | 83 – 100          |
| Corpuscular hemoglobin (pg)              | $27.1 \pm 0.3$ | $27.4 \pm 0.6$ | <b><math>28.9 \pm 0.4</math></b> | 27 – 32           |
| Mean corpuscular Hb concentration (g/dL) | $32.4 \pm 0.2$ | $32.3 \pm 0.4$ | $32.0 \pm 0.2$                   | 32 – 34.5         |
| <b>Platelets</b>                         |                |                |                                  |                   |
| Platelet (miles)                         | $282 \pm 15$   | $338 \pm 33$   | $277 \pm 35$                     | 150 - 400         |
| <b>White blood cells</b>                 |                |                |                                  |                   |
| Total Leukocytes ( $\times 10^3$ )       | $7.6 \pm 0.5$  | $6.7 \pm 0.6$  | $6.0 \pm 0.4$                    | 4.5-13.5          |
| Total Neutrophils (%)                    | $57 \pm 2$     | $49 \pm 3$     | $48 \pm 4$                       |                   |
| Segmented (%)                            | $57 \pm 2$     | $49 \pm 3$     | $48 \pm 4$                       |                   |
| Band (%)                                 | 0              | 0              | 0                                |                   |
| Metamyelocytes (%)                       | 0              | 0              | 0                                |                   |
| Myelocitos (%)                           | 0              | 0              | 0                                |                   |
| Promyelocytes (%)                        | 0              | 0              | 0                                |                   |
| Blasts (%)                               | 0              | 0              | 0                                |                   |
| Eosinophils (%)                          | 0              | 0              | $2 \pm 1$                        |                   |
| Basophils (%)                            | 0              | 0              | $1 \pm 0$                        | 0-3               |
| Monocytes (%)                            | $3 \pm 0$      | $4 \pm 0$      | $6 \pm 0$                        | 2-8               |
| Lymphocytes (%)                          | $40 \pm 2$     | $47 \pm 3$     | $44 \pm 4$                       | 20-40             |

One-way ANOVA was carried out followed by Tukey's post-hoc test. A  $p$ -value  $<0.05$  was considered as statistically significant.

**Supplementary Table S3.** Serum biochemical profile of participant children

| Determination              | Normal size<br>n = 21 | Undernutrition |                         |
|----------------------------|-----------------------|----------------|-------------------------|
|                            |                       | start<br>n = 9 | after 3 months<br>n = 7 |
| Glucose (mg/dL)            | 87 ±10                | 82 ±20         | 95 ±6.5                 |
| Triglycerides (mg/dL)      | 105 ±17               | 115 ±18        | 121 ±12                 |
| Total cholesterol (mg/dL)  | 133 ±19               | 146 ±31        | 151 ±28                 |
| Urea (mg/dL)               | 23 ±7.9               | 15.6 ±6.3      | 24.0 ±9.0               |
| Uric Acid (mg/dL)          | 3.3 ±0.8              | 3.1 ±0.4       | 3.2 ±0.6                |
| Creatinine (mg/dL)         | 0.7 ±0.1              | 0.70 ±0.1      | 0.70 ±0.1               |
| Total protein (g/dL)       | 8.1 ±0.4              | 8.5 ±0.3       | 8.3 ±0.6                |
| Albumin (g/dL)             | 4.8 ±0.4              | 5.0 ±0.3       | 5.2 ±0.6                |
| LDH (U/L)                  | 84 ±13                | 92 ±12         | 97 ±13                  |
| ALKP (U/L)                 | 298 ±80               | 301 ±85        | 347 ±127                |
| AST (U/L)                  | 6.5 ±1.5              | 6.6 ±0.9       | 6.9 ±0.6                |
| ALT (U/L)                  | 2.9 ±0.9              | 2.0 ±0.7       | 2.6 ±1.9                |
| GGT (U/L)                  | 4.7 ±1.6              | 5.9 ±1.3       | 7.6 ±1.9                |
| Total bilirubin (mg/dL)    | 0.5 ±0.3              | 0.5 ±0.2       | 0.6 ±0.2                |
| Direct bilirubin (mg/dL)   | 0.1 ±0.03             | 0.1 ±0.03      | 0.1 ±0.03               |
| Indirect bilirubin (mg/dL) | 0.4 ±0.3              | 0.4 ±0.2       | 0.5 ±0.2                |

Data is the mean of triplicates ± standard deviation. \*After 3 months of amaranth consumption. One-way ANOVA was carried out followed by Tukey's post-hoc test. A *p*-value <0.05 was considered as statistically significant.

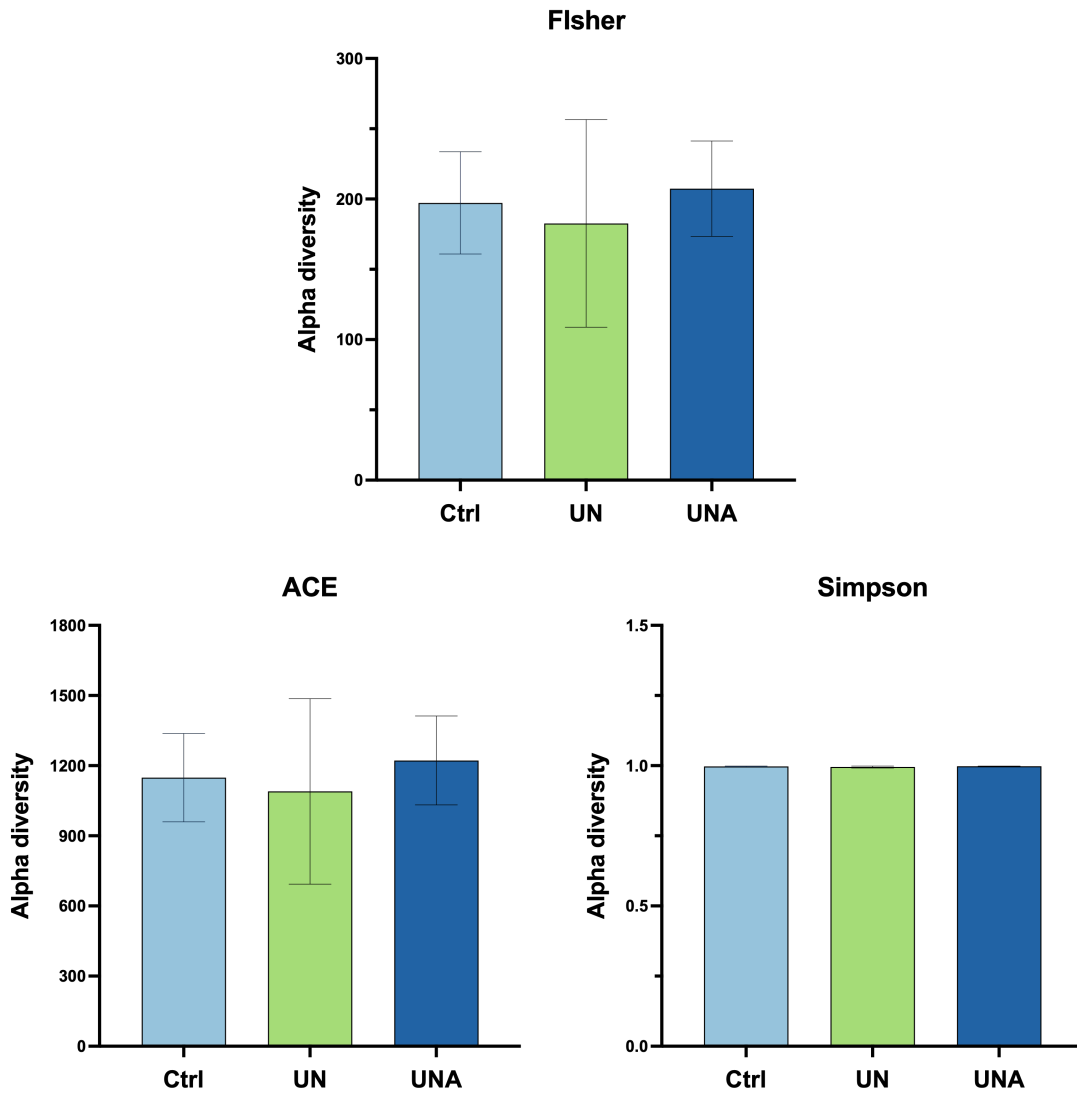

**Supplementary Figure S1.** Alpha-diversity differences amongst child's groups. Fisher, ACE (abundance-based coverage estimators), and Simpson values. Columns shows the means values and bars the standard deviation. ONE-way ANOVA was carried out followed by Tukey's post-hoc test at  $p < 0.05$ . Ctrl=control group of children with normal weight-high for age; UN=undernutrition children; UNA=undernutrition group after three months of amaranth consumption.

A)

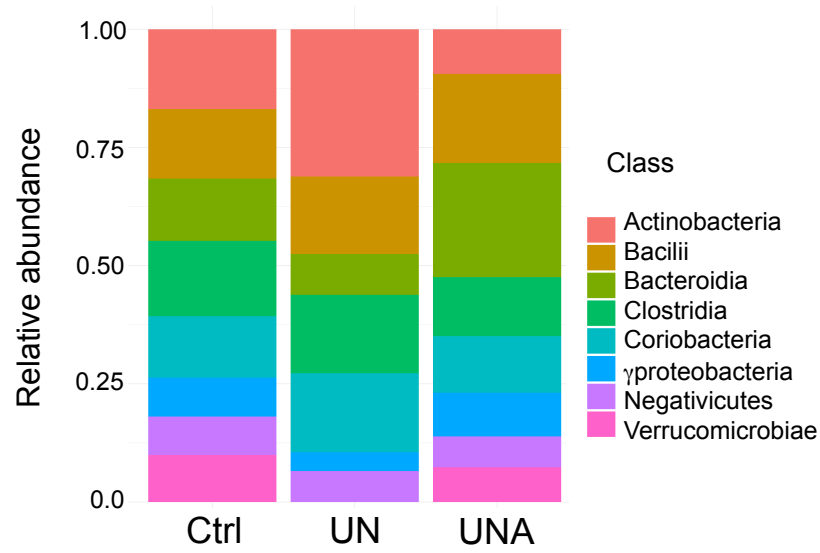

B)

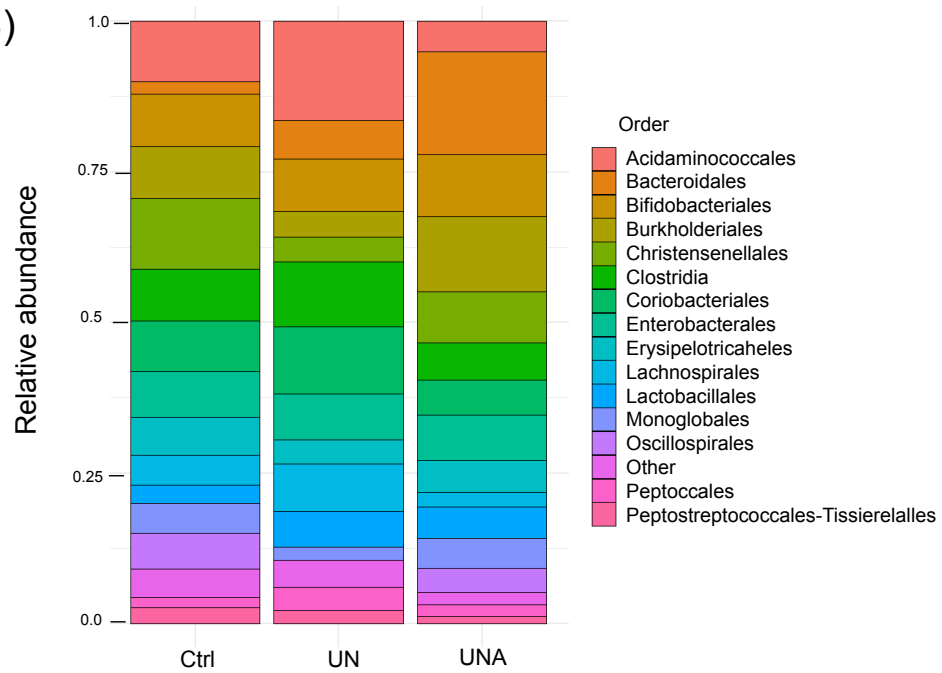

**Supplementary Figure S2.** Distribution of gut microbiota at A) class and B) order levels. Data showed the top-ten groups in each taxonomy clade.
